# Supplementary material for: Finding low-energy conformations of lattice protein models by quantum annealing
Source: PubMed Central journal article supplement — Sci Rep. 2012 Aug 13;2:571. doi: 10.1038/srep00571 (PMC3417777; doi:10.1038/srep00571), 2012-08-13
Supplement: srep00571-s1.pdf [file srep00571-s1.pdf]

## Supplementary Information: Finding low-energy conformations of lattice protein models by quantum annealing

Alejandro Perdomo-Ortiz,<sup>1</sup> Neil Dickson,<sup>2</sup> Marshall Drew-Brook,<sup>2</sup> Geordie Rose,<sup>2</sup> and Alán Aspuru-Guzik<sup>1, a)</sup>

<sup>1)</sup>*Department of Chemistry and Chemical Biology, Harvard University, 12 Oxford Street, Cambridge, MA 02138, USA*

<sup>2)</sup>*D-Wave Systems, Inc., 100-4401 Still Creek Drive, Burnaby, British Columbia V5C 6G9, Canada*

(Dated: 17 June 2012)

The paper *Finding low-energy conformations of lattice protein models by quantum-annealing* presents the first experimental and largest quantum annealing experiment related to an optimization problem in the physical sciences. In Sec. I, we summarize the construction of a more succinct version of the energy function describing the energy landscape of the six experimental realizations of the generalized lattice-folding model using Miyazawa-Jernigan pairwise interactions. In Sec. II, we present the necessary steps to transform the energy function into an expression which can be readily implemented in the quantum device. In Sec. III, we describe the quantum device used for our experiments and in Sec. IV we give details about the quantum simulations and results used to support the experimental outcomes.

---

<sup>a)</sup>Corresponding author's e-mail: [aspuru@chemistry.harvard.edu](mailto:aspuru@chemistry.harvard.edu)

# I. TRANSFORMATION OF THE ENERGY FUNCTION OF THE LATTICE-FOLDING MODEL INTO THE EXPERIMENTALLY REALIZABLE SPIN-GLASS HAMILTONIAN

The energy function for the lattice model can be obtained as a sum of different contributions,

$$E_p(\mathbf{q}) = E_{\text{onsite}}(\mathbf{q}) + E_{pw}(\mathbf{q}) + E_{\text{ext}}(\mathbf{q}) \quad (\text{S1})$$

where  $E_{\text{onsite}}(\mathbf{q})$  penalizes configurations with overlaps among any two amino acids,  $E_{pw}(\mathbf{q})$  accounts for nearest-neighbor pairwise-interaction energies among non-bonded amino acids, and  $E_{\text{ext}}(\mathbf{q})$  refers to any external potentials other than the ones coming from interactions among the amino acids defining the protein. For amino-acid sequences *in vacuo*, only  $E_{\text{onsite}}$  and  $E_{pw}$  are needed. The construction of these three-types of energy functions, in 2D and in 3D, for an arbitrary number of amino acids and interactions among them will be explained elsewhere. Hereforth, we will only focus on the case of energy functions in 2D.

## A. Case of the six-amino-acid sequence PSVKMA (Experiments 1-4)

For convenience, we reproduce Fig. 3 of the main text as Fig. S1, which illustrates and defines the six amino-acid sequence PSVKMA.

As explained in the main text, the description of all possible 2D  $N$ -amino-acid fold in vacuo can be described by a bit string of length  $2(N - 1)$ , with the first three bits held constant leaving  $\ell = 2N - 5$  binary variables as the computational variables of the problem,

$$\mathbf{q} = \underbrace{01}_{\text{turn}^1} \underbrace{0q_1}_{\text{turn}^2} \underbrace{q_2q_3}_{\text{turn}^3} \cdots \underbrace{q_{2N-6}q_{2N-5}}_{\text{turn}^{(N-1)}}. \quad (\text{S2})$$

For the case of  $N = 6$  (sequence PSVKMA), the problem is completely specified by the bit string

$$\mathbf{q}_{6AA} = \underbrace{01}_{\text{turn}^1} \underbrace{0q_1}_{\text{turn}^2} \underbrace{q_2q_3}_{\text{turn}^3} \underbrace{q_4q_5}_{\text{turn}^4} \underbrace{q_6q_7}_{\text{turn}^5}. \quad (\text{S3})$$

The 7-bit energy function describing the sequence PSVKMA (Scheme 1 in Fig. S1) is

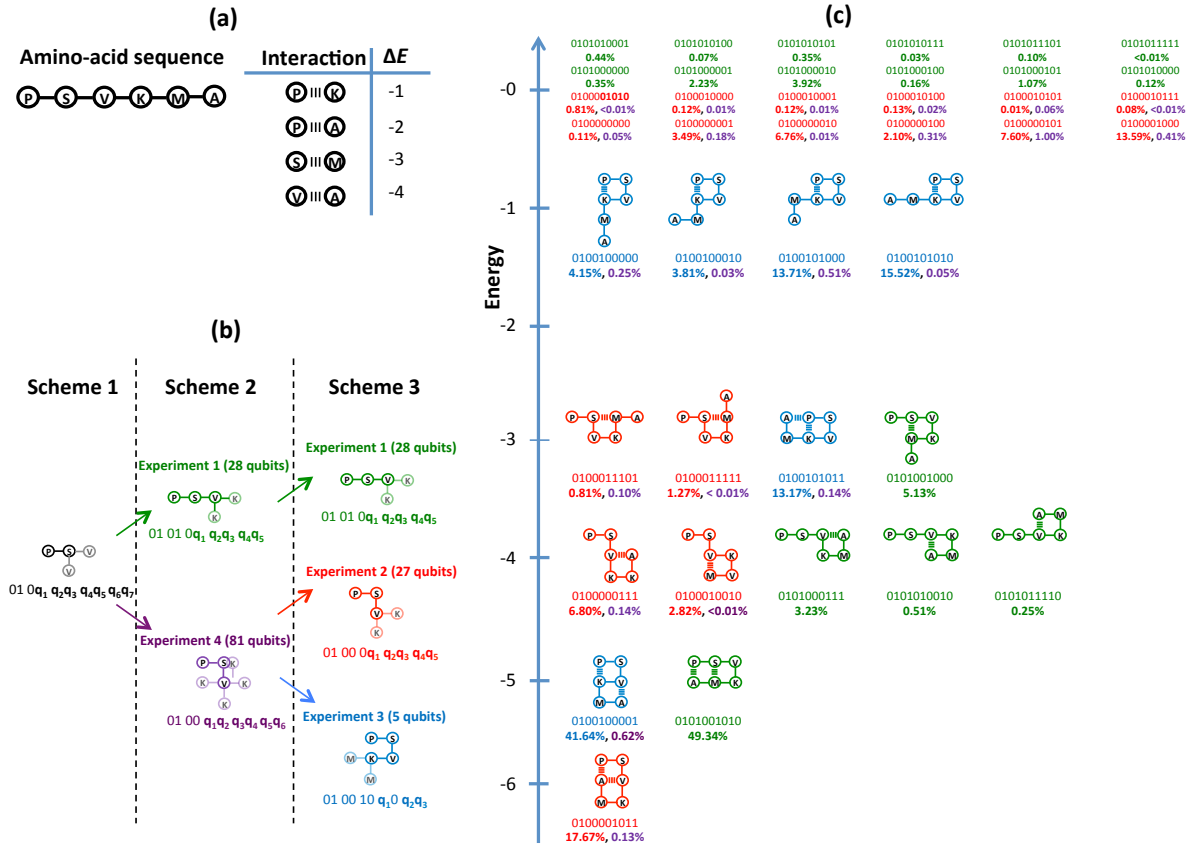

FIG. S1. (a) Representation of the six-amino-acid sequence, Proline-Serine-Valine-Lysine-Methionine-Alanine with its respective one-letter sequence notation, PSVKMA. We use the pairwise nearest-neighbor Miyazawa-Jernigan interaction energies reported in Table 3 of Ref. 1. (b) Divide and conquer approach showing three different schemes which independently solve the six-amino-acid sequence PSVKMA on a two-dimensional lattice. We solved the problem under Scheme2 and 3 (Experiments 1 through 4). (c) Energy landscape for the valid conformations of the PSVKMA sequence. Results of the experimentally-measured probability outcomes are given as color-coded percentages according to each of the experimental realizations described in panel (b). Percentages for states with energy greater than zero are 32.70%, 59.88%, 8.00%, and 95.97% for Experiments 1 through 4, respectively.

given by,

$$\begin{aligned}
E_{\text{PSVKMA}}(\mathbf{q}_{6AA}) = & -q_2 + 8q_1q_2 + 15q_2q_3 - 18q_1q_2q_3 - 3q_1q_4 + 12q_1q_2q_4 + 4q_3q_4 + 3q_1q_3q_4 \\
& - 6q_2q_3q_4 - 12q_1q_2q_3q_4 + 4q_2q_5 + 3q_1q_2q_5 - 15q_2q_3q_5 + 15q_4q_5 + 3q_1q_4q_5 \\
& - 6q_2q_4q_5 - 12q_1q_2q_4q_5 - 15q_3q_4q_5 + 28q_2q_3q_4q_5 - 2q_1q_2q_6 - 4q_3q_6 + 2q_2q_3q_6 \\
& + 13q_1q_2q_3q_6 - 2q_1q_4q_6 + 4q_1q_2q_4q_6 + 2q_3q_4q_6 + 13q_1q_3q_4q_6 + 4q_2q_3q_4q_6 \\
& - 37q_1q_2q_3q_4q_6 + 7q_5q_6 + 2q_2q_5q_6 + 13q_1q_2q_5q_6 + 4q_3q_5q_6 + 9q_2q_3q_5q_6 \\
& - 33q_1q_2q_3q_5q_6 - 20q_4q_5q_6 + 13q_1q_4q_5q_6 + 4q_2q_4q_5q_6 - 37q_1q_2q_4q_5q_6 + 9q_3q_4q_5q_6 \\
& - 33q_1q_3q_4q_5q_6 - 37q_2q_3q_4q_5q_6 + 99q_1q_2q_3q_4q_5q_6 - 4q_2q_7 + 4q_2q_3q_7 + 7q_4q_7 \\
& + 2q_2q_4q_7 + 13q_1q_2q_4q_7 + 4q_3q_4q_7 + 9q_2q_3q_4q_7 - 33q_1q_2q_3q_4q_7 + 4q_2q_5q_7 \\
& - 18q_4q_5q_7 + 9q_2q_4q_5q_7 - 33q_1q_2q_4q_5q_7 - 33q_2q_3q_4q_5q_7 + 62q_1q_2q_3q_4q_5q_7 + 7q_6q_7 \\
& + 2q_2q_6q_7 + 13q_1q_2q_6q_7 + 4q_3q_6q_7 + 9q_2q_3q_6q_7 - 33q_1q_2q_3q_6q_7 - 20q_4q_6q_7 \\
& + 13q_1q_4q_6q_7 + 4q_2q_4q_6q_7 - 37q_1q_2q_4q_6q_7 + 9q_3q_4q_6q_7 - 33q_1q_3q_4q_6q_7 - 37q_2q_3q_4q_6q_7 \\
& + 99q_1q_2q_3q_4q_6q_7 - 18q_5q_6q_7 + 9q_2q_5q_6q_7 - 33q_1q_2q_5q_6q_7 - 33q_2q_3q_5q_6q_7 \\
& + 62q_1q_2q_3q_5q_6q_7 + 53q_4q_5q_6q_7 - 33q_1q_4q_5q_6q_7 - 37q_2q_4q_5q_6q_7 + 99q_1q_2q_4q_5q_6q_7 \\
& - 33q_3q_4q_5q_6q_7 + 62q_1q_3q_4q_5q_6q_7 + 99q_2q_3q_4q_5q_6q_7 - 190q_1q_2q_3q_4q_5q_6q_7.
\end{aligned} \tag{S4}$$

As shown in Fig. S1, expressions for each of the different experiments in Schemes 2 and 3 can be sequentially obtained by fixing the value of some of the variables in  $E_{\text{PSVKMA}}(\mathbf{q}_{6AA})$ .

The energy function for Experiment 1 is obtained by evaluating  $E_{\text{PSVKMA}}(\mathbf{q}_{6AA})$  with  $q_1 = 1$  (third amino acid moves to the right) and  $q_2 = 0$  (fourth amino acid moves either down or right, exploiting upper/lower half-plane symmetry). After relabeling the five remaining variables so that their labels go from 1-5 instead of 3-7, i.e.,  $\mathbf{q}_{6AA} = 010q_1q_2q_3q_4q_5q_6q_7 \xrightarrow[\text{relabel}]{q_1=1, q_2=0} \mathbf{q}_{exp1} = 01010q_1q_2q_3q_4q_5$ , the resulting expression describing the energy landscape for Experiment 1 is given by

$$\begin{aligned}
E_{\text{PSVKMA}}^{exp1}(\mathbf{q}_{exp1}) = & -3q_2 + 7q_1q_2 + 18q_2q_3 - 15q_1q_2q_3 - 4q_1q_4 - 2q_2q_4 + 15q_1q_2q_4 \\
& + 7q_3q_4 + 4q_1q_3q_4 - 7q_2q_3q_4 - 24q_1q_2q_3q_4 + 7q_2q_5 + 4q_1q_2q_5 - 18q_2q_3q_5 \\
& + 7q_4q_5 + 4q_1q_4q_5 - 7q_2q_4q_5 - 24q_1q_2q_4q_5 - 18q_3q_4q_5 + 20q_2q_3q_4q_5 \\
& + 29q_1q_2q_3q_4q_5
\end{aligned} \tag{S5}$$

The energy function for Experiment 4 is obtained by evaluating  $E_{\text{PSVKMA}}(\mathbf{q}_{6AA})$  with  $q_1 = 0$  (third amino acid moves down). After renaming the six remaining variables so that their labels span 1-6 instead of 2-7, i.e.,  $\mathbf{q}_{6AA} = 010q_1q_2q_3q_4q_5q_6q_7 \xrightarrow[\text{relabel}]{q_1=0} \mathbf{q}_{exp4} = 0100q_1q_2q_3q_4q_5q_6$ , the resulting expression describing the energy landscape for Experiment 4 is given by

$$\begin{aligned}
E_{\text{PSVKMA}}^{exp4}(\mathbf{q}_{exp4}) = & -q_1 + 15q_1q_2 + 4q_2q_3 - 6q_1q_2q_3 + 4q_1q_4 - 15q_1q_2q_4 + 15q_3q_4 - 6q_1q_3q_4 \\
& - 15q_2q_3q_4 + 28q_1q_2q_3q_4 - 4q_2q_5 + 2q_1q_2q_5 + 2q_2q_3q_5 + 4q_1q_2q_3q_5 + 7q_4q_5 \\
& + 7q_5q_6 + 2q_1q_4q_5 + 4q_2q_4q_5 + 9q_1q_2q_4q_5 - 20q_3q_4q_5 + 4q_1q_3q_4q_5 + 9q_2q_3q_4q_5 \\
& - 37q_1q_2q_3q_4q_5 - 4q_1q_6 + 4q_1q_2q_6 + 7q_3q_6 + 2q_1q_3q_6 + 4q_2q_3q_6 + 9q_1q_2q_3q_6 \\
& + 4q_1q_4q_6 - 18q_3q_4q_6 + 9q_1q_3q_4q_6 - 33q_1q_2q_3q_4q_6 + 2q_1q_5q_6 + 4q_2q_5q_6 - 20q_3q_5q_6 \\
& + 9q_1q_2q_5q_6 + 4q_1q_3q_5q_6 + 9q_2q_3q_5q_6 - 37q_1q_2q_3q_5q_6 - 18q_4q_5q_6 + 9q_1q_4q_5q_6 \\
& - 33q_1q_2q_4q_5q_6 + 53q_3q_4q_5q_6 - 37q_1q_3q_4q_5q_6 - 33q_2q_3q_4q_5q_6 + 99q_1q_2q_3q_4q_5q_6
\end{aligned} \tag{S6}$$

The energy function for Experiment 2 is obtained by evaluating  $E_{\text{PSVKMA}}^{exp4}(\mathbf{q}_{exp4})$  with  $q_1 = 0$  (fourth amino acid moves either down or right). After renaming the five remaining variables so that their labels span 1-5 instead of 2-6, i.e.,  $\mathbf{q}_{exp4} = 0100q_1q_2q_3q_4q_5q_6 \xrightarrow[\text{relabel}]{q_1=0} \mathbf{q}_{exp2} = 01000q_1q_2q_3q_4q_5$ , the resulting expression describing the energy landscape for Experiment 2 is given by

$$\begin{aligned}
E_{\text{PSVKMA}}^{exp2}(\mathbf{q}_{exp2}) = & 4q_1q_2 + 15q_2q_3 - 15q_1q_2q_3 - 4q_1q_4 + 2q_1q_2q_4 + 7q_3q_4 + 4q_1q_3q_4 \\
& - 20q_2q_3q_4 + 9q_1q_2q_3q_4 + 7q_2q_5 + 4q_1q_2q_5 - 18q_2q_3q_5 + 7q_4q_5 + 4q_1q_4q_5 \tag{S7} \\
& - 20q_2q_4q_5 + 9q_1q_2q_4q_5 - 18q_3q_4q_5 + 53q_2q_3q_4q_5 - 33q_1q_2q_3q_4q_5.
\end{aligned}$$

Finally, the energy function for Experiment 3 is obtained by evaluating  $E_{\text{PSVKMA}}^{exp4}(\mathbf{q}_{exp4})$  with  $q_1 = 1$ ,  $q_2 = 0$  (fourth amino acid moves left) and  $q_4 = 0$  (fifth amino acid moves either down or left), exploiting the constraints imposed by the three fixed amino acids (P, S, and V). After renaming the three remaining variables so that their labels are  $q_1$ ,  $q_2$  and  $q_3$  instead of  $q_3$ ,  $q_5$ , and  $q_7$ , i.e.,  $\mathbf{q}_{exp4} = 0100q_1q_2q_3q_4q_5q_6 \xrightarrow[\text{relabel}]{q_1=1, q_2=0, q_4=0} \mathbf{q}_{exp3} = 010010q_10q_2q_3$ , the resulting expression describing the energy landscape for Experiment 3 is given by

$$E_{\text{PSVKMA}}^{exp3}(\mathbf{q}_{exp3}) = -1 - 4q_3 + 9q_1q_3 + 9q_2q_3 - 16q_1q_2q_3 \tag{S8}$$

## B. Case of the four-amino-acid sequence HPPH (Experiment 5)

Besides the six-amino-acid sequence considered above, we also constructed the energy function for the simplest of all sequences within lattice protein models, the HPPH four-amino-acid sequence within the HP model. For  $N = 4$ , we can specify any of its folds by the bit string  $\mathbf{q}_{exp5} = 010q_1q_2q_3$ . The three-bit energy function describing the energy landscape of Experiment 5 (see Fig. S2) is given by,

$$E_{HPPH}(\mathbf{q}_{exp5}) = -q_2 + 2q_1q_2 + 2q_2q_3 - 3q_1q_2q_3 \quad (\text{S9})$$

## C. Case of the four-amino-acid sequence HPPH under external constraints (Experiment 6)

A more realistic *in vivo* picture involves the presence of chaperone proteins assisting the folding dynamics towards the global minima. Chaperones, molecular docking, and molecular recognition are examples of problems which can be studied by adding external potentials,  $E_{ext}(\mathbf{q})$ , beyond the intrinsic interactions defined by the amino-acid chain,  $E_{onsite}(\mathbf{q})$  and  $E_{pw}(\mathbf{q})$  (see Eq. S1). The first consequence of adding an external potential  $E_{ext}(\mathbf{q})$  (as the chaperone-like environment surrounding the small four-amino-acid sequence HPPH, illustrated in Fig. S2 by the pink-shaded area near the peptide) is that we can no longer exploit the symmetry of the solution space for upper and lower half plane conformations. Therefore, we cannot set the first variable of the turn associated with the third amino acid to zero. Under external potentials, we specify arbitrary folds of the four-amino-acid problem by  $\mathbf{q}_{exp6} = 01q_1q_2q_3q_4$ , where  $q_1q_2(q_3q_4)$  encodes the orientation of the second (third) bond.

The external potential penalizes conformations in which either the third or fourth amino acid go into the chaperone region is:

$$E_{chap}(\mathbf{q}_{exp6}) = \lambda_{ext}^d(1 - q_1)(1 - q_2) + \lambda_{ext}^r(1 - q_1)q_2 + \lambda_{ext}^{dr}(1 - q_1)(1 - q_2)(1 - q_3)q_4 + \lambda_{ext}^{rd}(1 - q_1)q_2(1 - q_3)(1 - q_4) \quad (\text{S10})$$

The penalty  $\lambda_{ext}^d$  raises energy only when the third amino acid moves down ( $q_1 = 0, q_2 = 0$ ),  $\lambda_{ext}^r$  raises energy only when the third amino acid moves right ( $q_1 = 0, q_2 = 1$ ),  $\lambda_{ext}^{dr}$  raises energy only when the third amino acid moves down *and* the fourth amino acid moves right ( $q_1 = 0, q_2 = 0, q_3 = 0, q_4 = 1$ ), and the last penalty,  $\lambda_{ext}^{rd}$ , raises energy only when the third

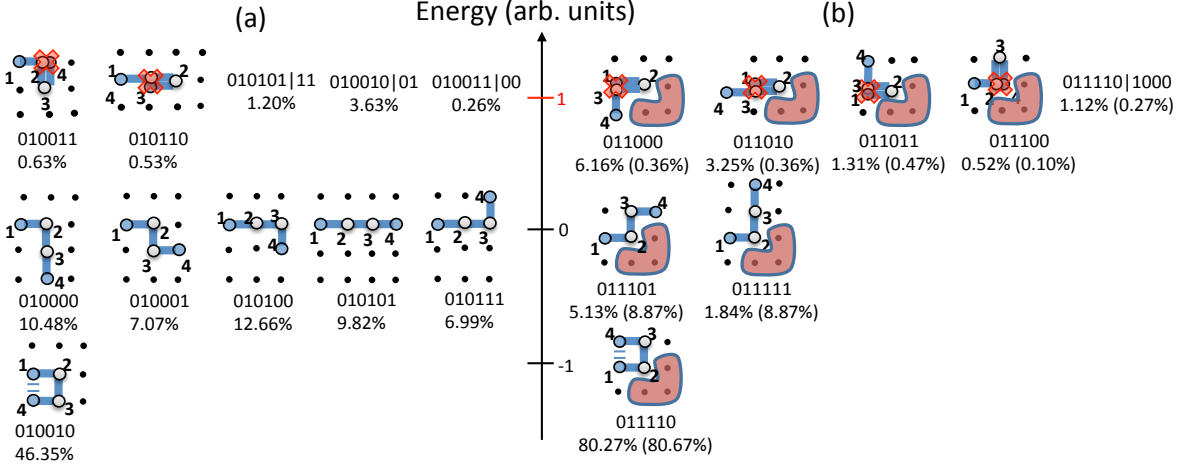

FIG. S2. Energy landscape for the four amino-acid sequence HPPH, (a) *in vacuo* (Experiment 5), and (b) under the presence of a chaperone-like environment (Experiment 6) represented by the red-shaded region. In panel (a) [panel (b)], percentages indicate the experimentally measured probabilities of each state collected over 10,000 [28,672] runs of the quantum annealing algorithm described in Sec. III C. In the case of Experiment 6, numerical results from the Bloch-Redfield model discussed in Sec IV are included in parenthesis. Although the variables involved in Experiment 5 (Experiment 6) are described by  $\mathbf{q}_{exp5} = 010q_1q_2q_3|q_4q_{4'}$  ( $\mathbf{q}_{exp6} = 01q_1q_2q_3q_4|q_5q_6q_2'q_4'$ ), under each fold we write only the physically-relevant variables which define the conformation. Since we show some experimental outcomes also for states with  $E > 0$ , then it is natural to find states which violate either the AND condition or the ferromagnetic condition; for these cases we explicitly write the auxiliary variables which went into the quantum hardware. For example, in Experiment 5 [panel (a)], the state  $\mathbf{q}_{exp5} = 010101|11$  violates the AND condition since  $q_4 \neq q_2q_3$ . In the case of the state  $\mathbf{q}_{exp5} = 010010|01$  the ferromagnetic condition for  $q_4$  is violated since  $q_4 \neq q_{4'}$ . Each overlap of the amino acids with the chaperone raises energy by four units, whereas overlaps (red crossings) among amino acids in the chain raise energy by two units.

amino acid moves right *and* the fourth amino acid moves down ( $q_1 = 0, q_2 = 1, q_3 = 0, q_4 = 0$ ). Each overlap of the amino acids with the chaperone increases energy by four units, i.e.,  $\lambda_{ext}^d = \lambda_{ext}^r = \lambda_{ext}^{dr} = \lambda_{ext}^{rd} = 4$ .

When the third amino acid is also allowed to move upwards, the energy function for the

HPPH chain in vacuo is given by,

$$\begin{aligned}
E_{HPPH}(\mathbf{q}_{exp6}) = & q_1 - q_3 + q_1q_3 + 2q_2q_3 - 4q_1q_2q_3 + 2q_1q_4 \\
& - 3q_1q_2q_4 + 2q_3q_4 - 4q_1q_3q_4 - 3q_2q_3q_4 + 7q_1q_2q_3q_4
\end{aligned}
\tag{S11}$$

After adding Eq. S10 and Eq. S11, the resulting energy function for the HPPH peptide in the presence of the “chaperone” environment illustrated in Fig. S2, is given by,

$$\begin{aligned}
E_{HPPH,chap}(\mathbf{q}_{exp6}) = & 4 - 3q_1 + 4q_2 - 4q_1q_2 - q_3 + q_1q_3 - 2q_2q_3 + 4q_4 - 2q_1q_4 \\
& - 8q_2q_4 + 5q_1q_2q_4 - 2q_3q_4 + 5q_2q_3q_4 - q_1q_2q_3q_4,
\end{aligned}
\tag{S12}$$

## II. EMBEDDING OF PROBLEM INSTANCES INTO THE QUANTUM HARDWARE

### A. Reduction of high-order terms to a 2-body Ising-like Hamiltonian

As explained in the main text, although the above energy expressions (Eqs. S4, S5, S6, S7, S8, S9, and S12) describe the desired energy landscape, they are not suitable for experimental implementation. We need to reduce the degree of the high-order terms (cubic, quartic, etc) to a quadratic expression (up to 2-body interactions). These high-order terms indicate many-body interactions which are not experimentally feasible within the current quantum device. To achieve this without altering the low-energy spectra ( $E \leq 0$ ) where the target minima is supposed to be found, we use the technique described in Ref. 2. In the main text, we presented the simplest case where only one reduction was required (expression for Experiment 3, Eq. S8). In the following we will focus on the next most complex case (Experiment 6, Eq. S12) which can be easily generalized to obtain any of the 2-body energy expressions for the larger experiments.

We introduce two ancilla binary variables,  $q_5$  and  $q_6$ , and substitute Eq. S12 with products of the form  $q_1q_2$  into  $q_5$  and  $q_3q_4$  into  $q_6$ . This substitution transforms the energy expression (Eq. S12) into a quadratic expression, e.g, the highest-order term which is quadratic,  $q_1q_2q_3q_4$ , is replaced by  $q_5q_6$  which becomes quadratic, as desired. Under these substitutions, whenever we have six-variable assignments,  $\mathbf{q}_{exp6} = 01q_1q_2q_3q_4|q_5q_6$ , such that  $q_6 = q_1 \wedge q_2 = q_1q_2$  and  $q_6 = q_3 \wedge q_4 = q_3q_4$ , we have the same energy spectrum as the one for the original quartic, four-variable expression. Since these two ancilla are new variables whose values are independent of the four original variables, we need to penalize six-variable assignments



whenever  $q_5 \neq q_1q_2$  and  $q_6 \neq q_3q_4$ . For every ‘‘collapse’’ of the form  $q_iq_j \rightarrow r_k$ , we add the penalty  $E_\wedge(q_i, q_j, r_k; \delta_{ij}) = \delta_{ij}(3r_k + q_iq_j - 2q_i r_k - 2q_j r_k)$ , where  $\delta_{ij}$  is a positive number representing a penalty chosen such that assignments violating this AND condition correspond to free-energies  $E > 0$ , outside the relevant search region ( $E \leq 0$ ). The function  $E_\wedge(q_i, q_j, r_k; \delta_{ij}) = 0$  only if  $r_k = q_iq_j$  and  $E_\wedge(q_i, q_j, r_k; \delta_{ij}) > 0$  if  $r_k \neq q_iq_j$ . The six-variable expression resulting from the insertion of the new ancilla variables plus the penalty function becomes,

$$\begin{aligned}
E_{HPPH,chap}^{2body}(\mathbf{q}) &= E_{HPPH,chap}(q_1, q_2, q_3, q_4; q_1q_2 \rightarrow q_5, q_3q_4 \rightarrow q_6) \\
&\quad + E_\wedge(q_1, q_2, q_5; \delta_{12}) + E_\wedge(q_3, q_4, q_6; \delta_{34}) \\
&= 4 - 3q_1 + 4q_2 + 6q_1q_2 - q_3 + q_1q_3 - 2q_2q_3 + 4q_4 - 2q_1q_4 - 8q_2q_4 + 4q_3q_4 \\
&\quad + 14q_5 - 12q_1q_5 - 12q_2q_5 + 5q_4q_5 + 10q_6 + 5q_2q_6 - 8q_3q_6 - 8q_4q_6 - q_5q_6
\end{aligned} \tag{S13}$$

where we have chosen  $\delta_{12} = 6$ , and  $\delta_{34} = 4$ .

To rewrite this quadratic form in terms of the spin variables  $\{s_i\}$ , we apply the transformation  $q_i \equiv \frac{1}{2}(1 - s_i)$  to each of the binary variables,

$$\begin{aligned}
E_{HPPH,chap}^{Ising} &= 10 + \frac{13}{4}s_1 + \frac{3}{4}s_2 + \frac{7}{4}s_3 + \frac{1}{4}s_4 - 2s_5 - 2s_6 + \frac{3}{2}s_1s_2 + \frac{1}{4}s_1s_3 - \frac{1}{2}s_2s_3 \\
&\quad - \frac{1}{2}s_1s_4 - 2s_2s_4 + s_3s_4 - 3s_1s_5 - 3s_2s_5 + \frac{5}{4}s_4s_5 + \frac{5}{4}s_2s_6 - 2s_3s_6 \\
&\quad - 2s_4s_6 - \frac{1}{4}s_5s_6
\end{aligned} \tag{S14}$$

After subtracting the constant (independent term), we can fulfill the requirement that  $|h_i| \leq 1$  and  $|J_{ij}| \leq 1$  by scaling all coefficients of Eq. S14 down by the maximum absolute value of all coefficients. The renormalized quadratic expression is given by,

$$\begin{aligned}
E_{exp6}^{unembedded}(\mathbf{s}) &= \frac{4}{13}(E_{HPPH,chap}^{ising} - 10) \\
&= (13s_1 + 3s_2 + 7s_3 + s_4 - 8s_5 - 8s_6 + 6s_1s_2 + s_1s_3 - 2s_2s_3 \\
&\quad - 2s_1s_4 - 8s_2s_4 + 4s_3s_4 - 12s_1s_5 - 12s_2s_5 + 5s_4s_5 + 5s_2s_6 - 8s_3s_6 \\
&\quad - 8s_4s_6 - s_5s_6)/13
\end{aligned} \tag{S15}$$

The final Ising spin-glass Hamiltonian (before embedding into the quantum device) can be

obtained by the substitution  $s_i \rightarrow \sigma_i^z$ .

$$\begin{aligned}
H_{exp6}^{\text{unembedded}} &= (13\sigma_1^z + 3\sigma_2^z + 7\sigma_3^z + \sigma_4^z - 8\sigma_5^z - 8\sigma_6^z + 6\sigma_1^z\sigma_2^z + \sigma_1^z\sigma_3^z - 2\sigma_2^z\sigma_3^z \\
&\quad - 2\sigma_1^z\sigma_4^z - 8\sigma_2^z\sigma_4^z + 4\sigma_3^z\sigma_4^z - 12\sigma_1^z\sigma_5^z - 12\sigma_2^z\sigma_5^z + 5\sigma_4^z\sigma_5^z + 5\sigma_2^z\sigma_6^z - 8\sigma_3^z\sigma_6^z \\
&\quad - 8\sigma_4^z\sigma_6^z - \sigma_5^z\sigma_6^z)/13 \quad (\text{S16})
\end{aligned}$$

## B. Embedding into the quantum hardware

Eq. S16 does not fulfill the chip-connectivity requirements (see Fig. S3) for the primal graph representing Eq. S16. This limitation is fixed at the cost of adding two new qubits serving as replicas of the two qubits which are linked by more than four connections. To enforce that the replicas of the  $i$ -th qubit ( $\sigma_{i'}^z$ ) produce the same outcome as the original  $i$ -th qubit, we couple  $\sigma_i^z$  and  $\sigma_{i'}^z$  with a strong ferromagnetic coupling, such that whenever the outcomes of the two variables are different they get penalized by a chosen penalty factor  $\gamma_i > 0$ . The function which performs this penalization for each replica  $i$ -th qubit is  $H_{FM}(\{\sigma_i^z\}; \gamma_i) = \gamma_i(1 - \sigma_i^z\sigma_{i'}^z)$ . Notice that  $H_{FM}(\{\sigma_i^z\}; \gamma_i) = 0$ , if  $s_i = s_{i'} = \pm 1$ , but  $H_{FM}(\{\sigma_i^z\}; \gamma_i) = 2\gamma_i$ , if  $s_i \neq s_{i'}$ . For this study, a value of  $\gamma_2 = \gamma_4 = 1$  suffices to leave assignments which violate this condition outside the region of interest with  $E \leq 0$ .

The redistribution of the connections among the original and primed qubits is given in the right panel of Fig. S3. The modified function taking into account the added ferromagnetic couplings is,

$$\begin{aligned}
\tilde{H}_{exp6} &= H_{exp6}^{\text{unembedded}}(\sigma_2^z \rightarrow \{\sigma_2^z, \sigma_{2'}^z\}; \sigma_4^z \rightarrow \{\sigma_4^z, \sigma_{4'}^z\}) \\
&\quad + H_{FM}(\{\sigma_2^z\}; \gamma_2 = 1) + H_{FM}(\{\sigma_4^z\}; \gamma_4 = 1) \\
&= (13\sigma_1^z + 3\sigma_2^z + 7\sigma_3^z + \sigma_4^z - 8\sigma_5^z - 8\sigma_6^z + 6\sigma_1^z\sigma_{2'}^z + \sigma_1^z\sigma_3^z - 2\sigma_2^z\sigma_3^z \\
&\quad - 2\sigma_1^z\sigma_{4'}^z - 8\sigma_2^z\sigma_4^z + 4\sigma_3^z\sigma_4^z - 12\sigma_1^z\sigma_5^z - 12\sigma_2^z\sigma_5^z + 5\sigma_4^z\sigma_5^z + 5\sigma_2^z\sigma_6^z - 8\sigma_3^z\sigma_6^z \\
&\quad - 8\sigma_{4'}^z\sigma_6^z - \sigma_5^z\sigma_6^z)/13 + (1 - \sigma_2^z\sigma_{2'}^z) + (1 - \sigma_4^z\sigma_{4'}^z) \quad (\text{S17})
\end{aligned}$$

Again, we subtract the independent constant terms from the insertion of the  $H_{FM}$  functions. The final expression, which is implementable in the quantum device is,

$$\begin{aligned}
H_{exp6} &= \tilde{H}_{exp6} - 2 = (13\sigma_1^z + 3\sigma_2^z + 7\sigma_3^z + \sigma_4^z - 8\sigma_5^z - 8\sigma_6^z + 6\sigma_1^z\sigma_{2'}^z + \sigma_1^z\sigma_3^z - 2\sigma_2^z\sigma_3^z \\
&\quad - 2\sigma_1^z\sigma_{4'}^z - 8\sigma_2^z\sigma_4^z + 4\sigma_3^z\sigma_4^z - 12\sigma_1^z\sigma_5^z - 12\sigma_2^z\sigma_5^z + 5\sigma_4^z\sigma_5^z + 5\sigma_2^z\sigma_6^z - 8\sigma_3^z\sigma_6^z \\
&\quad - 8\sigma_{4'}^z\sigma_6^z - \sigma_5^z\sigma_6^z - 13\sigma_2^z\sigma_{2'}^z - 13\sigma_4^z\sigma_{4'}^z)/13 \quad (\text{S18})
\end{aligned}$$

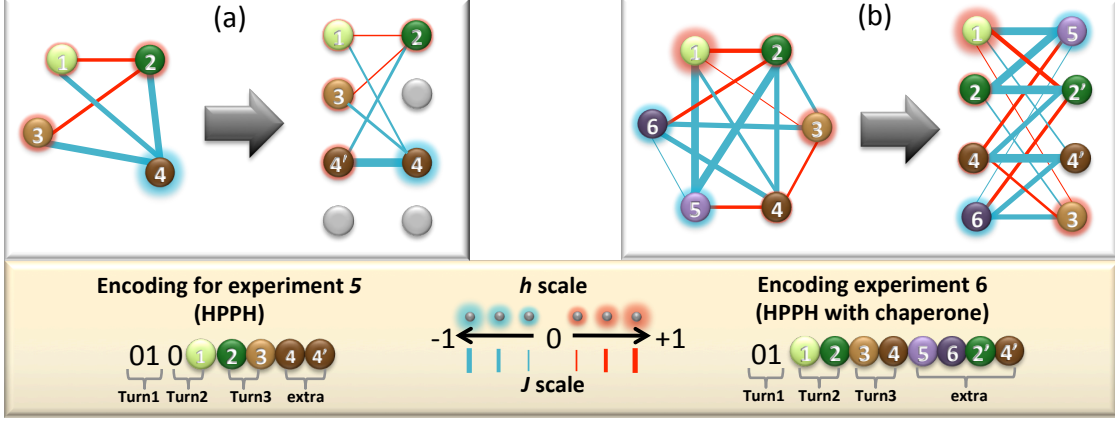

FIG. S3. In the graphs presented in (a) and (b), each node denotes a qubit, and the color and extent of its glow denotes the sign and strength of its corresponding longitudinal field,  $h_i$ . The edges represent the interaction couplings,  $J_{ij}$ , where color indicates sign and thickness indicates magnitude. The maximum couplings are indicated in the figure by heavy lines. (a) Primal graph (left) and the embedded representation of the expression implemented in the quantum hardware for Experiment 5 (HPPH *in vacuo*). (b) Primal graph (left) and the embedded eight-qubit expression (Eq. S18) for Experiment 6 (HPPH in the chaperone-like environment).

TABLE S1. Number of qubits needed for each one of the six experiments described in Fig. S1 and Fig. S2. The most compact version of the energy function corresponds to the second column. Each one of the steps, reduction of high-order terms in the energy function towards a 2-body Ising-like Hamiltonian and embedding of this Ising expression to fulfill the physical connectivity of the qubits in the device, requires more auxiliary qubits. The final column reports the number of qubits in the experimentally implemented expression of the energy function.

| Experiment # | Number of qubits needed |                   |                              |
|--------------|-------------------------|-------------------|------------------------------|
|              | energy function         | Ising Hamiltonian | hardware-embedded expression |
| 1            | 5                       | 10                | 28                           |
| 2            | 5                       | 10                | 27                           |
| 3            | 3                       | 4                 | 5                            |
| 4            | 6                       | 19                | 81                           |
| 5            | 3                       | 4                 | 5                            |
| 6            | 4                       | 6                 | 8                            |

The embeddings for Experiments 3 and 4 are shown in Fig. 4 and Fig. 1 of the main text, respectively. The embeddings corresponding to Experiment 5 and 6 are represented in Fig. S3, while the embedding for the medium size problem instances (Experiments 1 and 2) are represented in Fig. S4.

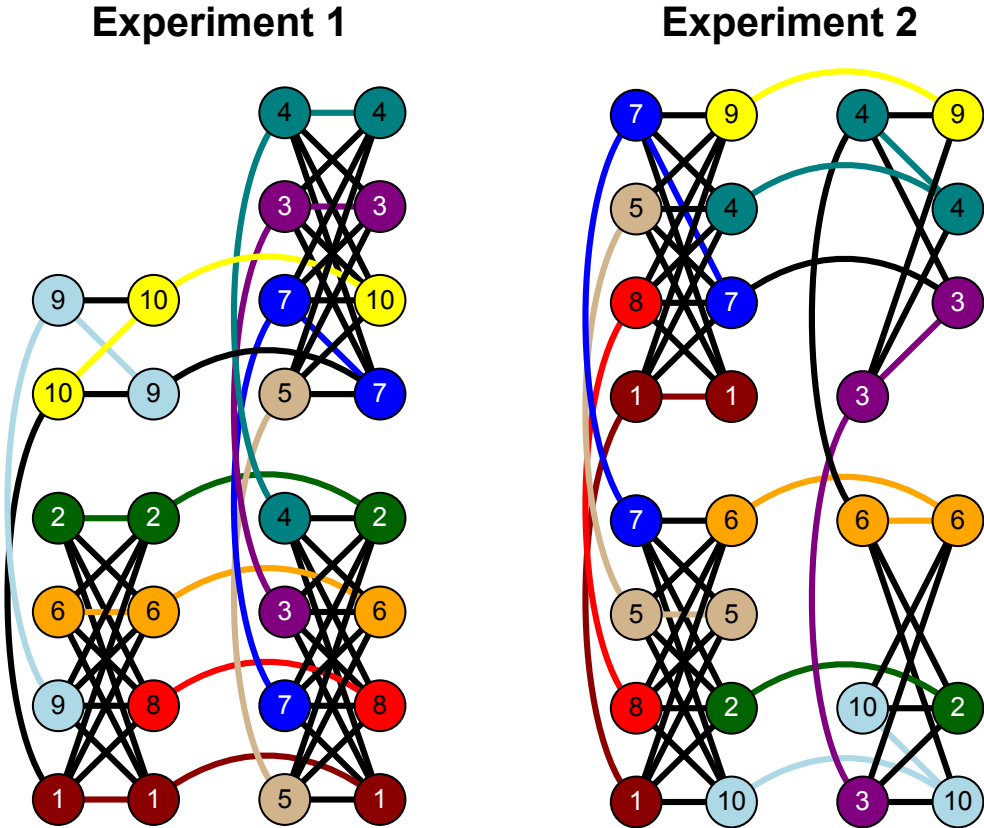

FIG. S4. Embedding of Experiments 1 and 2 into the quantum hardware. The 28 qubits (27 qubits) from Experiment 1 (Experiment 2) have been relabeled to show the qubits which were strongly ferromagnetically coupled representing the same variable and biased to have the same experimental outcomes. Both problem instances resulted in ten-qubit spin-glass Hamiltonians after reducing their energy expressions to the Ising-like 2-body interaction expression. The additional qubits are part of the embedding procedure used to fulfill the arbitrary connectivity of the Ising expression, allowing for couplings of qubits that are not directly coupled in hardware.

### III. EXPERIMENTAL DETAILS

#### A. The processor chip

All experiments discussed herein were conducted on a sample fabricated in a four Nb layer superconducting integrated circuit process employing a standard Nb/AlOx/Nb trilayer, a TiPt resistor layer, and planarized SiO<sub>2</sub> dielectric layers deposited with a plasma-enhanced chemical vapour deposition process. Design rules included 0.25  $\mu\text{m}$  lines and spaces for wiring layers and a minimum junction diameter of 0.6  $\mu\text{m}$ . Experiments were conducted in an Oxford Instruments Triton 400 Cryofree DR at a temperature of 20 mK.

The sample processor chip contains a coupled array of 128 qubits of a design discussed in Ref. 3. Each qubit is an rf-SQUID flux qubit with a double-well potential, as depicted in Fig. S5. They are magnetically coupled with sign and magnitude tunable couplers in a manner described in Ref. 4. The array is built up of 16 eight-qubit unit cells. For example, Experiment 6 was conducted using a single unit cell (highlighted in Fig. S6a). The connectivity of qubits within the unit cell is shown schematically in Fig. S6b.

Three different chips available with this same architecture were used to run the different problem instances (Experiments 1-6, Fig. S1 and S2). Experiments 1, 2, and 4 were run in one chip, while Experiment 3 and 5 used a different chip. Experiment 6 used the same chip and unit cell used in Ref. 5. Since all the chips have the same architecture and design but different calibration parameters, we will focus on the chip used to run Experiment 6, and report all the parameters used to run the numerical simulation reported in Sec. IV.

#### B. Magnetic Environment

The magnetic field in the sample space was controlled with three concentric high permeability shields and an innermost superconducting shield. Further active compensation of residual fields was achieved with compensation coils oriented along three axes, and used in conjunction with on-chip superconducting quantum interference device (SQUID) magnetometers located near each of the four corners of the processor block (Fig. S6a). Compensation coils were adjusted to minimise the magnetic field measured at the magnetometers while the chip was at 4.2 K. The chip was then thermally cycled just above and then back down through its superconducting transition temperature at this minimal field. We estimate

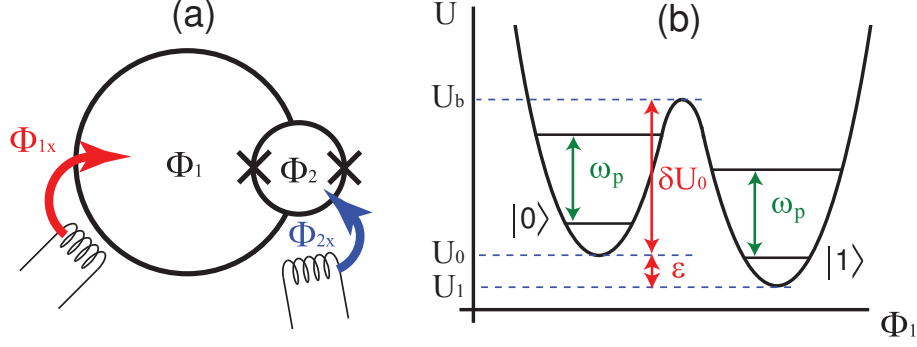

FIG. S5. (a) Illustration of a single rf-SQUID flux qubit.  $\Phi_{1x}$  is the flux bias applied to the major (qubit) loop, and  $\Phi_{2x}$  is the flux bias applied to the minor (CJJ) loop. (b) Cross-section of the double-well potential of an rf-SQUID flux qubit, with 4 localized energy levels marked.  $\Phi_{1x}$  primarily affects the qubit bias  $\epsilon$ , whereas  $\Phi_{2x}$  affects both the barrier height  $\delta U_0$  and  $\epsilon$ .

that the chip was cooled through its superconducting transition with a field normal to the chip surface  $|B_{\perp}| < 2.5$  nT, and that parallel to its surface  $|B_{\parallel}| < 3.6$  nT over the area of active circuitry.

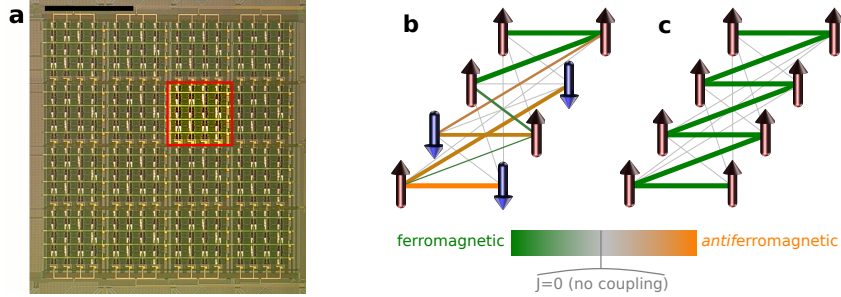

FIG. S6. (a) Optical photograph of a portion of a partially fabricated 128 qubit chip. The block of eight qubits used in this experiment is outlined in red. (b) Artificial spins are connected in a complete bipartite graph  $K_{4,4}$ , and interact via couplers which are continuously tunable from ferromagnetic to antiferromagnetic interaction. A line between artificial spins indicates that a coupler is present. The colouring indicates one possible arrangement of coupler settings. (c) An example of how a linear ferromagnetic Ising spin chain could be implemented by selectively tuning some couplers to a ferromagnetic setting ( $J < 0$ ) (green), and turning off the rest ( $J = 0$ ).

## C. Experimental method

The experiment discussed in the manuscript is outlined in Table S2.

TABLE S2. Outline of experiment

### I. Initialisation

1. **Calibration:** measure intrinsic device parameters such as the circulating current  $I_p$  in each qubit and its dependence on the CJJ loop flux bias  $\Phi_{2x}$ , the qubit critical current  $I_c$ , the qubit inductances, and transformer mutual inductances.
2. **Homogenisation:** use on-chip programmable flux biases to ensure  $I_p$  of the different qubits match during annealing.

### II. Annealing & read-out

1. **Set  $h, J$**
2. **Anneal** (reduce  $A(\tau)$  and increase  $B(\tau)$ )
3. **Read** state of spins

The steps in part **I** were performed once and would, in general, only be performed once for a new chip. The calibration step **I-1** is performed by measuring the circulating current  $I_p$  in each qubit, and its dependence on the CJJ loop flux bias  $\Phi_{2x}$ . From this information, one can extract the qubit critical current  $I_c$  and inductance  $L$ . Details of this procedure are discussed in detail in section IV.A of Ref. 3. Given these qubit parameters, the effective inter-qubit coupling strength attained by the tunable couplers can be determined. This was done by measuring the difference in magnetic flux coupled into a qubit B between states  $|\uparrow\rangle$  and  $|\downarrow\rangle$  of a qubit A. This coupled flux was measured as a function of the setting of the tunable coupler between qubits A and B, in a manner described in detail in Ref. 6.

Once the device parameters for each qubit have been extracted, the effective junction  $I_c$  and inductance  $L$  of each qubit are tuned with on-chip tuning structures so as to make them as similar to each other as possible. The goal of this homogenisation procedure is to ensure that the circulating currents,  $I_p$ , of several qubits remain close to each other in magnitude while the qubits undergo annealing. This procedure is discussed in detail in Refs. 7 and 8.

On-chip tuning structures enabling this homogenisation are also described in Refs. 3 and 4. Figure S7 shows the superimposed plots of the measured circulating current  $I_p$  (left) and tunnel splitting  $A(\tau)$  (right) of each of the eight qubits used in this experiment after homogenisation. Qubit capacitance is extracted by measuring the spacing of macroscopic resonant tunnelling rate peaks<sup>9</sup>. At any point in  $\Phi_{2x}$ , the standard deviation of the measured  $I_p$  across the 8 qubits is less than 25 nA. The uncertainty in each measurement of  $I_p$  is about 9 nA. The homogenised device parameters are summarised in Table S3.

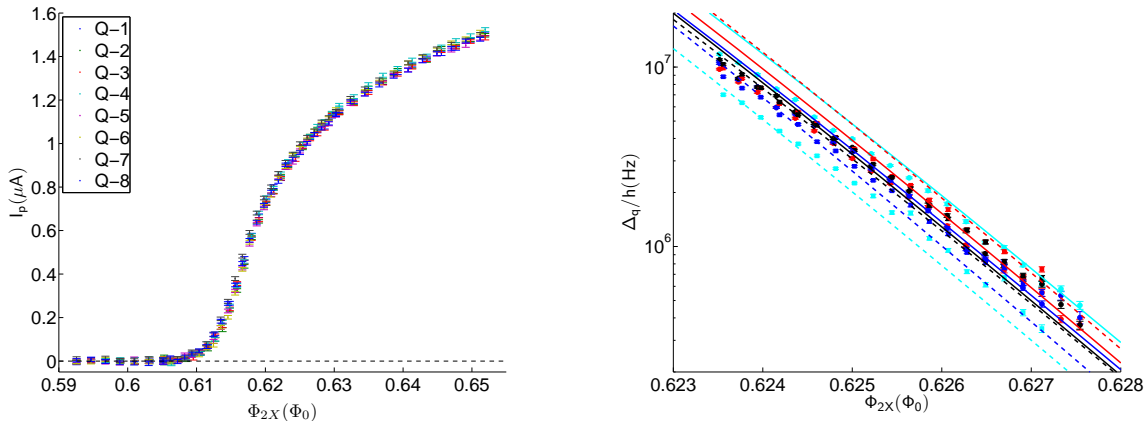

FIG. S7. (Left) Measured circulating current  $I_p$  of each of the eight qubits used in this experiment after homogenisation (step **I-2**). (Right) Comparison of measured tunnel splitting  $A(\tau)$  (labelled  $\Delta_q$ ) for the eight qubits used in the experiment, and the  $A(\tau)$  fit to a physical model of the rf-SQUID. Fits of measured tunnel splitting  $A(\tau)$  are used in conjunction with fits to  $I_p$  and MRT rate measurements to estimate parameters shown in Table S3.

The steps in **II** are performed repeatedly. Step **II-1** is where the Hamiltonian parameters  $h_i$  and  $J_{ij}$  from Eq. S18 are programmed. For each such problem specification, steps **II-2** and **II-3** were repeated to allow collection of statistics about the relative probabilities of the possible states. For data presented in this paper related to Experiment 6, **II-1** was repeated 8 times, after each of which, **II-2** and **II-3** were repeated 4096 times, for a total of 32,768 repetitions of **II-2** and **II-3**. However, step **II-1** non-negligibly heated the chip, so in order to allow ample time for the chip to cool back to the base temperature, the first 512 repetitions after each execution of step **II-1** were removed, leaving  $8 \times 3,584 = 28,672$  total repetitions of **II-2** and **II-3**. In the case of Experiments 1-5 the statistics were collected over 10,000 measurements in each experiment and enough thermalization time was allowed.



TABLE S3. Total Josephson junction critical current, qubit inductance, inductance of loop 2, and junction capacitance extracted from circulating current and tunnel splitting measurements, and Macroscopic Resonant Tunneling (MRT) peak spacing.

| Qubit | $I_c(\mu A)$ | $L_1$ (pH) | $L_2$ (pH) | C(ff) |
|-------|--------------|------------|------------|-------|
| 1     | 3.350        | 337.9      | 26         | 185   |
| 2     | 3.363        | 339.7      | 26         | 190   |
| 3     | 3.340        | 333.0      | 26         | 190   |
| 4     | 3.363        | 338.5      | 26         | 190   |
| 5     | 3.340        | 334.0      | 26         | 195   |
| 6     | 3.352        | 334.8      | 26         | 190   |
| 7     | 3.365        | 338.8      | 25         | 185   |
| 8     | 3.330        | 332.9      | 26         | 190   |

Therefore, all data was included in the statistics without the need for removing any of the initial measurements. The experimental results of the probabilities measured are reported as percentages in Figs. S1 and S2.

Annealing was performed by raising the single qubit tunneling barrier. This is accomplished by changing  $\Phi_{2x}$  linearly in time, from  $0.592 \Phi_0$  to  $0.652 \Phi_0$ , over a period of  $148 \mu s$ , as shown in Figure S8. Circulating current  $I_p$  shown in Figure S7 is plotted over exactly this range of  $\Phi_{2x}$ . This also has the effect of changing parameters  $A(\tau)$  and  $B(\tau)$  from Eq. (3) of the main paper, as shown in Fig. 1b of the main paper, and as discussed in Ref. 10. Control points  $\alpha$  and  $\beta$  in Figure S8 correspond to the beginning and ending times of Fig. 2(b) of the main text.

After the qubits have completed annealing, when  $\Phi_{2x}$  has been set to  $\Phi_0$  as shown on the right in Figure S8, states of the spins are read with a hysteretic dc-SQUID readout, as described in Ref. 11.

#### D. Thermometry

In addition to a Ruthenium Oxide thermometer mounted on the dilution refrigerator mixing chamber, the effective qubit device temperature obtained during the measurements

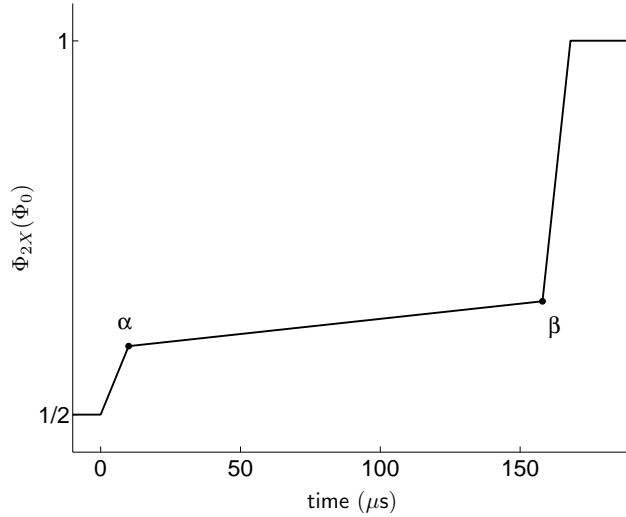

FIG. S8. The annealing schedule is defined by the applied flux  $\Phi_{2x}(t)$ . The qubits make a transition between being monostable and bistable between control points  $\alpha = (10 \mu s, -0.592 \Phi_0)$  and  $\beta = (158 \mu s, -0.652 \Phi_0)$ .

discussed in the manuscript was determined in two independent ways. The first is based on analysis of the single-qubit Macroscopic Resonant Tunnelling (MRT) rate, and its dependence on the qubit loop flux bias  $\Phi_{1x}$ . Measurements and analysis of MRT rates for the devices used in this experiment are discussed in Ref 12. The second is based on measurement of the equilibrium  $P_{\uparrow}$  vs.  $\Phi_{1x}$  attained at fixed barrier height (fixed value of  $\Phi_{2x}$ ). Both of these techniques are discussed in some detail in Ref. 9.

At a fixed barrier height achieved with a fixed value of  $\Phi_{2x}$ , the equilibrium probability  $P_{\uparrow}$  approaches the thermal distribution:

$$P_{\uparrow}(t \rightarrow \infty) = \frac{1}{2} \left[ \frac{1}{2} + \tanh \left( \frac{I_p \Phi_{1x}}{k_B T_{th}} \right) \right] \quad (\text{S19})$$

where  $I_p$  is the value of circulating current obtained at that value of  $\Phi_{2x}$  and  $T_{th}$  is the effective device temperature. Fitting a measurement of  $P_{\uparrow}$  as a function of  $\Phi_{1x}$  to Eq. S19, combined with a knowledge of  $I_p$ , allows us to extract  $T_{th}$ .

Measurement of  $T_{th}$  was performed on two of the devices at each temperature setting. An average of at least two independent measurements of the device temperature  $T_{th}$  of each of two qubits is compared against the mixing chamber thermometer temperature reading ( $T_{MXC}$ ) in Figure S9. Uncertainty in  $T_{th}$  was dominated by the uncertainty in the fit

transition width for each measurement, which was generally found to be larger than the standard deviation of the separate measurements.

The temperature extracted from MRT transition rate widths ( $T_{MRT}$ ) is also plotted vs.  $T_{MXC}$  for temperatures below 40 mK, in Figure S9. From these plots it is clear that the two methods generally agree with each other as well as with the mixing chamber thermometer to within 3 mK over the temperature range used in the experiment.

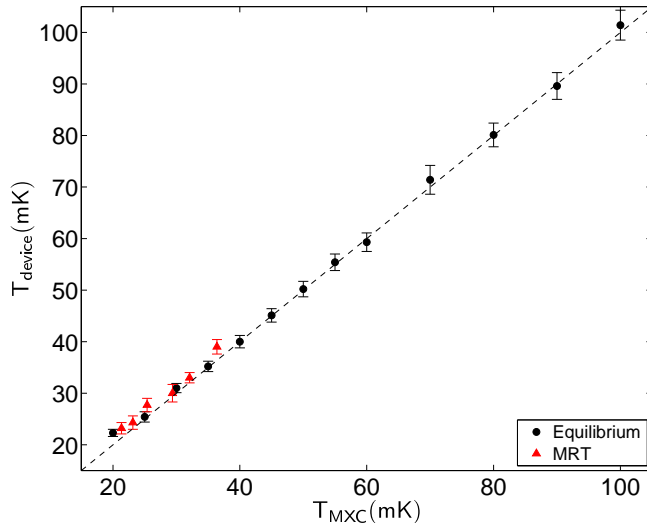

FIG. S9. Plots of  $T_{th}$  (black circles) and  $T_{MRT}$  (red triangles) vs. the temperature measured with the Ruthenium Oxide thermometer mounted on the mixing chamber  $T_{MXC}$ .

#### IV. QUANTUM SIMULATIONS

To obtain better quantitative understanding of the behaviour of the system, a simulation was conducted to model this experiment. The agreement between the numerical simulations can be seen in panel (b) of Fig. S2, where both percentages [experiment (theory)] are reported next to each other for each one of the low-energy conformations.

Our simulation strategy is as follows: We first write a Hamiltonian for the superconducting circuit based on standard circuit models for capacitances, inductances, and Josephson junctions. This Hamiltonian is expected to correctly describe the behaviour of coupled rf-SQUIDs. We then numerically calculate the evolution of the system based on this Hamiltonian using quantum mechanical equations of motion which take into account coupling to

an environment. Therefore, we predict the quantum evolutions for the same system Hamiltonian, the same coupling to environment, and the same type of noise spectral densities. This provides a fair comparison to the experimental data.

### A. rf-SQUID Hamiltonian

A simplified version of the rf-SQUID qubit used in our processor is illustrated in Fig. S5a. (A more complete description of the actual qubits can be found in Ref. 3.) It has two main superconducting loops and therefore two flux degrees of freedom  $\Phi_1$  and  $\Phi_2$ , subject to external flux biases  $\Phi_{1x}$  and  $\Phi_{2x}$ , respectively. The Hamiltonian of such an rf-SQUID is written as

$$H_{\text{SQUID}} = \frac{q_1^2}{2C_1} + \frac{q_2^2}{2C_2} + U(\Phi_1, \Phi_2) \quad (\text{S20})$$

where  $C_1$  and  $C_2$  are parallel and series combinations of the junction capacitances,  $q_1$  and  $q_2$  are the sum and difference of the charges stored in the two Josephson junctions respectively, and

$$U(\Phi_1, \Phi_2) = (\Phi_1 - \Phi_{1x})^2/2L_1 + (\Phi_2 - \Phi_{2x})^2/2L_2 - 2E_J \cos(\pi\Phi_2/\Phi_0) \cos(2\pi\Phi_1/\Phi_0), \quad (\text{S21})$$

is a 2-dimensional potential with  $L_i$  being the inductances of the two loops and  $\Phi_0 = h/2e$ , the flux quantum. We have assumed symmetric Josephson junctions with Josephson energies  $E_J = I_c \Phi_0 / 2\pi$ , where  $I_c$  is the junctions' critical current. (A small asymmetry can be tuned away in situ in the physical implementation<sup>3</sup>.)

At  $\Phi_{1x} \approx \Phi_0/2$ , the potential can become bistable and therefore form a two-dimensional double-well potential. If  $L_2$  is small enough so that the deviation of  $\Phi_2$  from  $\Phi_{2x}$  can be neglected, then the two-dimensional classical potential  $U(\Phi_1, \Phi_2)$  can be approximated by a one-dimensional double-well potential, as shown in Fig. S5b. However, with our realistic qubit parameters,  $\Phi_2$  cannot be neglected and therefore is accounted for in all our numerical calculations. When  $\Phi_{1x} = \Phi_0/2$ , the two wells are symmetric with no energy bias between them. One can tilt the potential by changing  $\Phi_{1x}$  and establish an energy bias, as depicted in Fig. S5b. It is also possible to change the barrier height by changing  $\Phi_{2x}$ .

An array of such qubits can be modelled by summing contributions of Eq. (S20) from each device plus terms that describe magnetic coupling of the loops:

$$H_S = \sum_i H_{\text{SQUID}}^{(i)} + \sum_{i>j} H_{\text{coupl}}^{(ij)} \quad (\text{S22})$$

Coupling between qubits  $i$  and  $j$  can be modelled as a mutual inductance  $M_{ij}$  between loop 1 of each pair of coupled qubits:

$$H_{\text{coupl}}^{(ij)} = (\Phi_1^{(i)} - \Phi_{1x}^{(i)})(\Phi_1^{(j)} - \Phi_{1x}^{(j)})M_{ij}/L_1^{(i)}L_1^{(j)} \quad (\text{S23})$$

As discussed in Section III C above, all parameters, i.e., inductances  $L_\alpha^{(i)}$ , capacitances  $C_\alpha^{(i)}$ , and Josephson critical currents  $I_c^{(i)}$ , are measured independently for each qubit.

To describe the system accurately we also need to introduce interaction with environment. Flux noise, which is the dominant noise in flux qubits, couples to the  $i$ th qubit as fluctuations  $\delta\Phi_{\alpha x}^{(i)}$  of the external flux  $\Phi_{\alpha x}^{(i)}$ :

$$H_{\text{int}} = - \sum_{\alpha=1}^2 \sum_i \frac{\Phi_\alpha^{(i)} - \Phi_{\alpha x}^{(i)}}{L_\alpha^{(i)}} \delta\Phi_{\alpha x}^{(i)} \quad (\text{S24})$$

The noise is much smaller for the smaller loop  $\Phi_{2x}^{(i)}$  than for the larger loop  $\Phi_{1x}^{(i)}$  due to the loop size. The flux noise  $\delta\Phi_{\alpha x}^{(i)}$  is assumed to be uncorrelated between the qubits, which agrees with recent experimental observation<sup>13</sup>.

### 1. *Chip calibration and device parameter extraction*

Device parameters were extracted for the simulations through a series of independent measurements of qubit circulating current, tunnel splitting  $\Delta$ , and MRT peak spacing. A discussion of how these measurements are performed is given in Ref. 3. Parameter values used in simulations are summarised in Table S3.

## B. Quantum Simulation

To simulate the quantum mechanical dynamics of the system, we treat (S22)-(S24) as quantum mechanical Hamiltonians. In that case, the charge  $q_\alpha^{(i)}$  is taken to be an operator, which is the momentum conjugate to the flux operator  $\Phi_\alpha^{(i)}$  with commutation relation:  $[\Phi_\alpha^{(i)}, q_\alpha^{(i)}] = i\hbar$ . Unfortunately, it is impossible to calculate the dynamics of the system

directly on the  $2N$ -dimensional continuous potential quantum mechanically. Instead, we use energy discretization as a means to simplify the calculation. The simplest way to accomplish this is to treat an rf-SQUID as a 2-state system or qubit and replace (S22) by a coupled qubit Hamiltonian. One may go further and keep more than two states per rf-SQUID in the calculation, as we shall discuss below.

We first numerically diagonalise the single rf-SQUID Hamiltonian (S20) to obtain the lowest eigenvalues and eigenvectors. We treat the lowest few energy levels as the subspace relevant for computation. We then write the Hamiltonian in the basis of states that are localised within the wells. Such states are not true eigenfunctions of the Hamiltonian and, therefore, are metastable towards tunnelling to the opposite well. Hence, the resulting Hamiltonian in such a basis will have off-diagonal terms between states in the opposite wells but not between states within each well. The latter is because those states should be stationary within their own wells; any transition (relaxation) between them is only induced by the environment.

Let  $|l\rangle$  denote localised states within the wells. We use even (odd) state numbers, i.e.,  $l = 2n$  ( $2n+1$ ), with  $n = 0, 1, 2, \dots$ , to denote states that are localised in the left (right) well. For the lowest  $M$  energy levels ( $M$  is taken to be even), the effective  $M \times M$  tunnelling Hamiltonian is written as

$$H_S = \sum_{l=0}^{M-1} E_l |l\rangle\langle l| + \sum_{n,m=0}^{M/2-1} K_{2n,2m+1} (|2n\rangle\langle 2m+1| + |2m+1\rangle\langle 2n|) \quad (\text{S25})$$

where  $E_l$  is the energy expectation value for state  $|l\rangle$  and  $K_{2n,2m+1}$  is the tunnelling amplitude between states  $|2n\rangle$  and  $|2m+1\rangle$ , which exist in opposite wells. Notice that there is no matrix element between states on the same well:  $\langle 2n|H_S|2m\rangle = \langle 2n+1|H_S|2m+1\rangle = 0$ , which means that the states are metastable only towards tunnelling to the other side, or the states are quasi-eigenstates of the Hamiltonian within their own sides. All parameters of the tunnelling Hamiltonian, i.e.,  $E_l$  and  $K_{ll'}$  are extracted from the original rf-SQUID Hamiltonian (S20). For the 2-state qubit model we keep only the lowest two energy levels of (S25). The effective qubit Hamiltonian can be written as

$$H_{eff} = -\frac{1}{2}(\epsilon\sigma_z + \Delta\sigma_x) \quad (\text{S26})$$

where

$$\epsilon = E_0 - E_1, \quad \Delta = -2K_{01}, \quad (\text{S27})$$

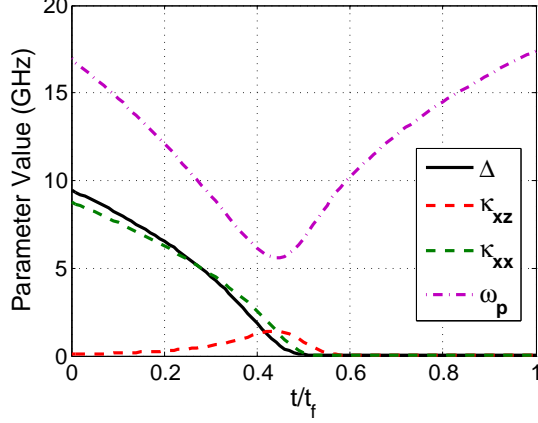

FIG. S10. Parameters of the 4-level model for rf-SQUID qubit as a function of time during annealing.

We also go beyond the 2-state model and keep 4 states per rf-SQUID. Those 4 states can be represented by two coupled qubits, one of which represents the direction of persistent current or flux, and the other one generating intrawell energy levels. We represent the first (logical) qubit by Pauli matrices  $\sigma_\alpha$ , and the extra (ancilla) qubit by Pauli matrices  $\tau_\alpha$ . The effective Hamiltonian for those two coupled qubits can be written as

$$H_{eff} = -\frac{1}{2}(\epsilon\sigma_z + \Delta\sigma_x) + \frac{1}{2}[\omega_p\tau_z + \kappa_{xz}\sigma_x(1 + \tau_z) + \kappa_{xx}\sigma_x\tau_x]. \quad (\text{S28})$$

It is easy to show that (S28) is equivalent, up to a constant energy, to Hamiltonian (S25), with  $M = 4$ , if

$$\epsilon = E_0 - E_1 = E_2 - E_3, \quad \omega_p = E_2 - E_0 = E_3 - E_1, \quad \Delta = -2K_{01}, \quad (\text{S29})$$

$$\kappa_{xz} = K_{23} - K_{01} \approx K_{23}, \quad \kappa_{xx} = 2K_{03} = 2K_{12}. \quad (\text{S30})$$

As can be seen, the coupling between logical and ancilla qubits are of XX+XZ type. Coupling qubits to each other is accomplished using  $\sigma_z$  operators which represent the direction of the induced flux. The ancilla qubits remain uncoupled from each other and from other qubits. It should be noted that the readout at the end of the evolution can only distinguish “left” well from “right” well in the double-well potential and cannot distinguish levels within each well. This is equivalent to reading out logical qubits and not ancilla qubits, but as we mentioned above, only logical qubits carry information.

To properly treat the environment, we need to write the interaction Hamiltonian (S24) in the subspace of the lowest energy levels in terms of Pauli matrices. For quantum simulations

we only consider noise coupling to the larger loop in Fig. S5a. Let us consider a single rf-SQUID and write the interaction Hamiltonian as

$$H_{\text{int}} = -\frac{\Phi_1 - \Phi_{1x}}{L_1} \delta\Phi_{1x} \quad (\text{S31})$$

We define the qubit persistent current by

$$I_p = \frac{1}{L_1} |\langle l | (\Phi_1 - \Phi_{1x}) | l \rangle|. \quad (\text{S32})$$

Here, we take  $I_p$  to be independent of  $|l\rangle$  for the low lying states considered, although in reality there could be a small dependence. The interaction Hamiltonian can then be written as

$$H_{\text{int}} = -\frac{1}{2}(\sigma_z + \lambda\tau_x)Q, \quad (\text{S33})$$

where

$$Q = 2I_p\delta\Phi_{1x}, \quad \lambda = \frac{\langle 0 | H_{\text{int}} | 2 \rangle}{2I_p L_1} = \frac{\langle 1 | H_{\text{int}} | 3 \rangle}{2I_p L_1} \quad (\text{S34})$$

The matrix elements  $\langle 0 | H_{\text{int}} | 2 \rangle$  or  $\langle 1 | H_{\text{int}} | 3 \rangle$  are calculated directly via Eq. S31 using the eigenfunctions of the rf-SQUID Hamiltonian, Eq. S20). The values of  $I_p$  and  $\lambda$  can therefore be calculated numerically from the original rf-SQUID Hamiltonian. Only  $Q$  remains which should be characterised via its spectral density, which is the subject of Appendix A.

Quantum evolution of the system was calculated using a Markovian master equation for the density matrix described in Ref. 14. Since the evolution is very slow (adiabatic) and temperature is low, only a small number of energy levels are expected to be occupied during the evolution. We write the density matrix in the instantaneous energy eigenstate basis and truncate it to the lowest 24 energy levels, which was found to sufficiently describe the type of evolution studied here. We use both 2-state and 4-state models for rf-SQUIDs, as described above, in our simulations. The result of the 4-level model simulation is shown in Fig. S2b.

## Appendix A: Noise spectral density

The quantum noise operator  $Q = 2I_p\delta\Phi_{1x}$  is related to the flux noise as expected (for simplicity we only consider one rf-SQUID), and is characterised by its correlation function. Let us define the spectral density

$$S(\omega) = \int_{-\infty}^{\infty} dt e^{i\omega t} \langle Q(t)Q(0) \rangle = 4I_p^2 S_{\Phi}(\omega) \quad (\text{S1})$$



where

$$S_{\Phi}(\omega) = \int_{-\infty}^{\infty} dt e^{i\omega t} \langle \delta\Phi_{1x}(t) \delta\Phi_{1x}(0) \rangle \quad (\text{S2})$$

is the spectral density of the flux noise. No direct measurement of  $S_{\Phi}(\omega)$  at all frequencies is available. We assume the spectral density is a sum of low frequency and high frequency components:  $S_{\Phi}(\omega) = S_{LF}(\omega) + S_{HF}(\omega)$ . For the low frequency component we use

$$S_{LF}(\omega) = \frac{(A^2/k_B T) \hbar \omega |\omega|^{-\alpha}}{1 - e^{-\hbar \omega / k_B T}}, \quad (\text{S3})$$

with  $\alpha \approx 1$ , which at low  $\omega$  behaves as 1/f noise:  $\sim A^2 |\omega|^{-\alpha}$ . Parameter  $A$  is measured from low frequency noise measurement<sup>15</sup> and is found to be  $A \approx 3 \text{ n}\Phi_0$ .

The high frequency parts of the spectral density is assumed to be ohmic,

$$S_{HF}(\omega) = \left( \frac{\hbar^2}{4I_{p0}^2} \right) \frac{\eta \omega e^{-|\omega|/\omega_c}}{1 - e^{-\hbar \omega / k_B T}}, \quad (\text{S4})$$

where  $\omega_c$  is the upper cutoff frequency,  $\eta$  is the dimensionless coupling coefficient, and  $I_{p0}$  is the value of persistent current at which  $\eta$  is measured. The coupling coefficient and the persistent current are found, using Macroscopic resonant tunnelling experiment (MRT), to be  $\eta \approx 0.4$  and  $I_{p0} \approx 1 \mu\text{A}$ . The details of extraction of  $\eta$  via MRT are presented elsewhere<sup>12</sup>.

This leaves no free parameters for the quantum simulations.

## REFERENCES

- <sup>1</sup>Miyazawa, S. & Jernigan, R. L. Residue-residue potentials with a favorable contact pair term and an unfavorable high packing density term, for simulation and threading. *J. Mol. Biol.* **256**, 623–644 (1996).
- <sup>2</sup>Perdomo, A., Truncik, C., Tubert-Brohman, I., Rose, G. & Aspuru-Guzik, A. Construction of model hamiltonians for adiabatic quantum computation and its application to finding low-energy conformations of lattice protein models. *Phys. Rev. A* **78**, 012320–15 (2008).
- <sup>3</sup>Harris, R. *et al.* Experimental demonstration of a robust and scalable flux qubit. *Phys. Rev. B* **81**, 134510 (2010).
- <sup>4</sup>Johnson, M. W. *et al.* A scalable control system for a superconducting adiabatic quantum optimization processor. *Supercond. Sci. Tech.* **23**, 065004 (2010).
- <sup>5</sup>Johnson, M. W. *et al.* Quantum annealing with manufactured spins. *Nature* **473**, 194–198 (2011).

- <sup>6</sup>Harris, R. *et al.* Compound Josephson-junction coupler for flux qubits with minimal crosstalk. *Phys. Rev. B* **80**, 052506 (2009).
- <sup>7</sup>Harris, R. *et al.* Experimental investigation of an eight-qubit unit cell in a superconducting optimization processor. *Phys. Rev. B* **82**, 024511 (2010).
- <sup>8</sup>Harris, R. *et al.* Synchronization of multiple coupled rf-SQUID flux qubits. *New J. Phys.* **11**, 123022 (2009).
- <sup>9</sup>Harris, R. *et al.* Probing noise in flux qubits via macroscopic resonant tunneling. *Phys. Rev. Lett.* **101**, 117003 (2008).
- <sup>10</sup>Harris, R. *et al.* Implementation of a quantum annealing algorithm using a superconducting circuit. *arXiv:0903.3906v1* (2009).
- <sup>11</sup>Berkley, A. J. *et al.* A scalable readout system for a superconducting adiabatic quantum optimization system. *Supercond. Sci. Tech.* **23**, 105014 (2010).
- <sup>12</sup>Lanting, T. *et al.* Probing high-frequency noise with macroscopic resonant tunneling. *Phys. Rev. B* **83**, 180502 (2011).
- <sup>13</sup>Lanting, T. *et al.* Cotunneling in pairs of coupled flux qubits. *Phys. Rev. B* **82**, 060512 (2010).
- <sup>14</sup>Amin, M. H. S., Truncik, C. J. S. & Averin, D. V. Role of single-qubit decoherence time in adiabatic quantum computation. *Phys. Rev. A* **80**, 022303 (2009).
- <sup>15</sup>Lanting, T. *et al.* Geometrical dependence of the low-frequency noise in superconducting flux qubits. *Phys. Rev. B* **79**, 060509(R) (2009).
